# Supplementary material for: Re-Entry Evaluation of Chinese Blood Donors with Unconfirmed Hepatitis B Screening Results
Source: MDPI journal article supplement (doi:10.3390/v14112545), 2022-11-17
Supplement: s1 [file s1]

**Supplementary Table S1.**

| <b>Abbreviations</b> |                                                                                       |
|----------------------|---------------------------------------------------------------------------------------|
| ECA                  | Electro-chemiluminescence assay                                                       |
| EIA                  | Enzymatic immunoassay                                                                 |
| ELISA                | Enzyme-linked immunoabsorbent assay                                                   |
| ID                   | Individual                                                                            |
| LoD                  | Limit of detection                                                                    |
| MP                   | Minipool                                                                              |
| NAT                  | Nucleic acid testing                                                                  |
| NDR                  | Reactive in the initial multiplex assay but non-reactive in the discriminatory assays |
| NR                   | Non-reactive                                                                          |
| NRR                  | Reactive in the initial multiplex assay but non-reactive when repeated                |
| OBI                  | Occult hepatitis B virus infection                                                    |
| WP                   | Window period                                                                         |
